# Supplementary material for: Combination of STING and TLR 7/8 Agonists as Vaccine Adjuvants for Cancer Immunotherapy
Source: MDPI journal article supplement (doi:10.3390/cancers14246091), 2022-12-11
Supplement: s1 [file s1]

## **Supplementary information**

### **Combination of STING and TLR 7/8 agonists as vaccine adjuvants for cancer immunotherapy**

Shubhmita Bhatnagar<sup>1</sup>, Vishnu Revuri<sup>1</sup>, Manan Shah<sup>1,2</sup>, Peter Larson<sup>3</sup>, Zekun Shao<sup>1,2</sup>, Daohai Yu<sup>4</sup>, Swayam Prabha<sup>5,6</sup>, Thomas S. Griffith<sup>7</sup>, David Ferguson<sup>3</sup>, Jayanth Panyam<sup>1,2,6\*</sup>

<sup>1</sup>Department of Pharmaceutical Sciences, School of Pharmacy, Temple University, Philadelphia PA 19140

<sup>2</sup>Department of Pharmaceutics, College of Pharmacy, University of Minnesota, Minneapolis MN 55455

<sup>3</sup>Department of Medicinal Chemistry, College of Pharmacy, University of Minnesota, Minneapolis MN 55455

<sup>4</sup>Center for Biostatistics and Epidemiology, Lewis-Katz School of Medicine, Temple University, Philadelphia PA 19140

<sup>5</sup>Fels Cancer Institute for Personalized Medicine, Lewis-Katz School of Medicine, Temple University, Philadelphia PA 19140

<sup>6</sup>Fox Chase Comprehensive Cancer Institute, Temple University, Philadelphia PA 19111

<sup>7</sup>Department of Urology, Medical School, University of Minnesota, Minneapolis MN 55455

| Marker                     | Immune Cell Subsets                         | Function                                    |
|----------------------------|---------------------------------------------|---------------------------------------------|
| CD45                       | All immune cells                            | Leukocyte marker                            |
| CD3                        | T cells                                     | Lineage Marker                              |
| CD49                       | NK cells                                    | Lineage marker                              |
| CD4                        | CD4 T cells                                 | Lineage marker                              |
| CD8                        | CD8 T cells                                 | Lineage Marker                              |
| PD-1                       | T cells                                     | Checkpoint molecule                         |
| CD69                       | T, NK                                       | Activation marker                           |
| CD44                       | T cells                                     | Memory & Activation                         |
| Tetramer                   | CD8 T cells                                 | OVA-specific CTLs                           |
| NKG2D                      | NK cells                                    | Activation marker                           |
| CD11c                      | DCs – high,<br>Mφ, B cells, Monocytes – low | Lineage marker                              |
| F4/80                      | Mφ                                          | Lineage Marker                              |
| CD19                       | B cells                                     | Lineage marker                              |
| H-2K <sup>b</sup> SIINFEKL | DCs, Mφ, B cells                            | Binds to OVA on MHC I expressed by APCs     |
| PD-L1                      | APCs and tumor cells                        | Checkpoint molecule                         |
| CD40                       | DCs, Mφ, B cells                            | Activation marker                           |
| CD80                       | DCs, Mφ, B cells                            | Activation, M1 marker (F4/80+ CD206- CD80+) |
| CD86                       | DCs, Mφ, B cells                            | Activation marker                           |
| CD206                      | Immunosuppressive Mφ                        | M2 marker                                   |

  

| Cell Subset    | Markers                   |
|----------------|---------------------------|
| DCs            | CD45+ F4/80- CD11c+       |
| B cells        | CD45+ F4/80 – CD19+       |
| F4/80          | CD45+ F4/80+ CD11c-       |
| M2 macrophages | CD45+ F4/80+ CD80- CD206+ |
| CD4 T cells    | CD45+ CD3+ CD4+ CD8-      |
| CD8 T cells    | CD45+ CD3+ CD4- CD8+      |
| NK Cells       | CD45+ CD3- CD49b+ NKG2D+  |
| Tumor cells    | CD45-                     |

**Figure S1.** List of markers used for flow cytometry studies and gating strategies for different cell populations.

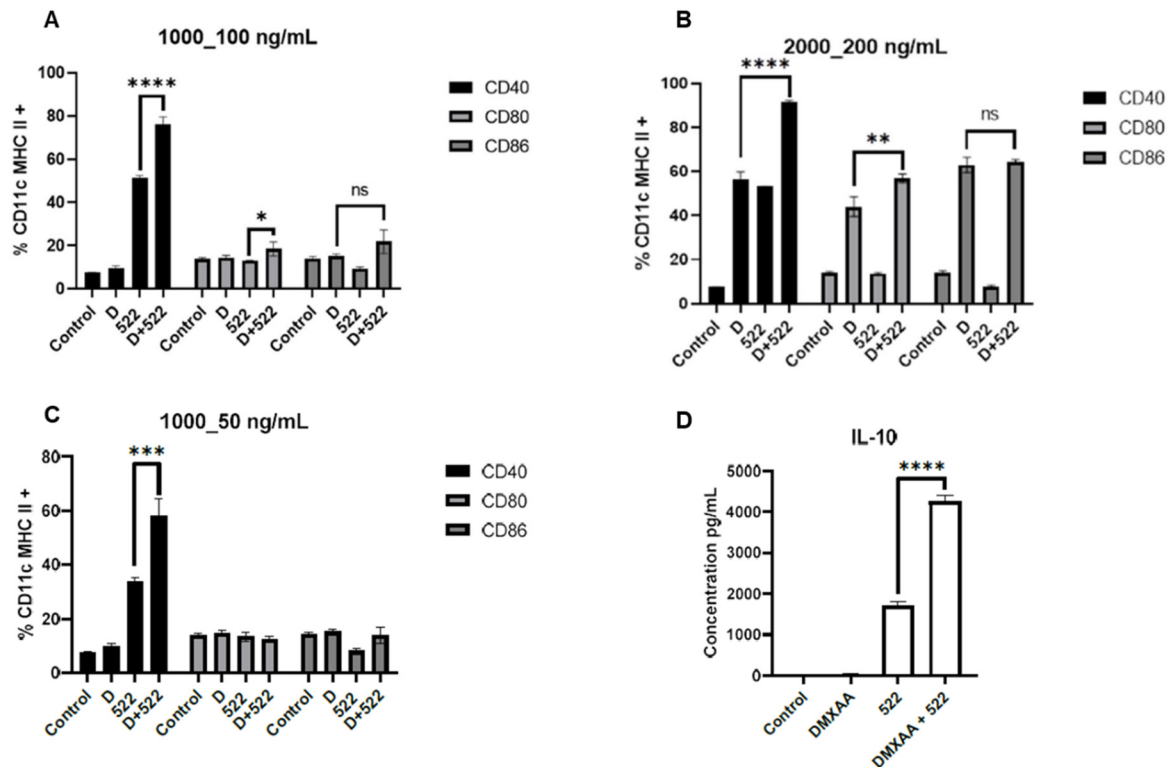

**Figure S2.** BMDC costimulatory molecule expression and cytokine secretion. BMDCs were incubated with DMXAA (1000 ng/ml, 2000 ng/ml), 522 (50 ng/ml, 100 ng/ml, 200 ng/ml) and DMXAA + 522 (1000\_100, 1000\_50, 2000\_200) for 24 h and costimulatory molecules CD40, CD80 and CD86 were measured by flow cytometry (A-C). CD11c and MHCII double positive cells identified as BMDCs in the population and were gated further for analysis. A population was selected and gated on the MHCII vs CD11c axis. Double positive events were analyzed for CD86, CD80 and CD40 expression. BMDCs were incubated with DMXAA (2000 ng/ml), 522 (50 ng/ml) and DMXAA + 522 (2000\_50 ng/ml) for 24 h and IL-10 were measured by ELISA (D). Results are reported as mean  $\pm$  SD,  $n=3$ , \*\*\*\* $p<0.0001$ , \*\*\* $p<0.001$ , One-way ANOVA.

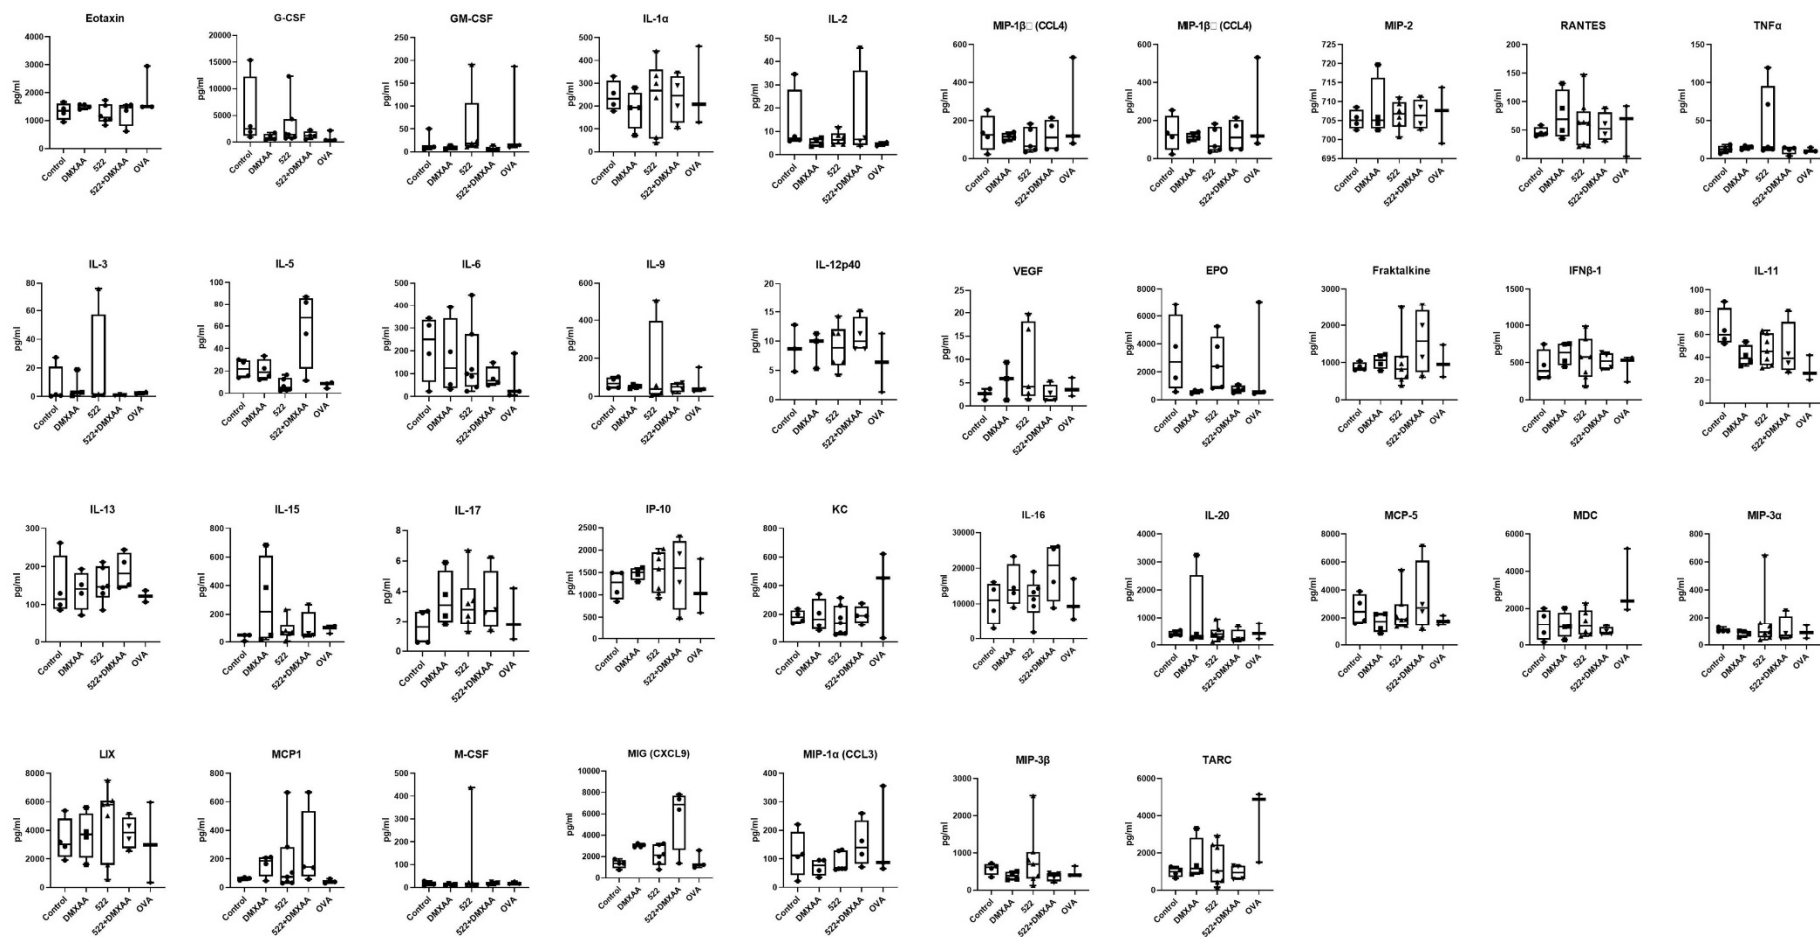

Figure S3. Different cytokines measured in the blood serum on day 7 after five consecutive doses day 1 through day 5.
